# Supplementary material for: Evaluating layer contributions and salt coating effects on mask performance
Source: Royal Society of Chemistry journal article supplement (doi:10.1039/d4ra04581e), 2024-01-01
Supplement: d4ra04581e1.pdf [file d4ra04581e1.pdf]

## Supporting Information

# Evaluating Layer Contributions and Salt Coating Effects on Mask Performance

**Sumin Han<sup>a</sup>, Caitlyn Maliksi<sup>a</sup>, Euna Oh<sup>a</sup>, Surjith Kumaran<sup>a</sup>, Kyu Hyoung Lee<sup>b</sup>, Dae-Hong  
Ko<sup>b</sup>, and Hyo-Jick Choi<sup>a,\*</sup>**

<sup>a</sup>Department of Chemical and Materials Engineering, University of Alberta, Edmonton, AB T6G  
1H9, Canada

<sup>b</sup>Department of Materials Science and Engineering, Yonsei University, Seoul 03722, Republic of  
Korea

**Table S1.** Summary of breath resistance and filtration efficiency standards for respirators and masks

| Category          | Country                                 | Agency                                                                 | Standard                                  | N95, FFP2, KN95, KF94                |                           | Surgical, medical masks               |                                 |
|-------------------|-----------------------------------------|------------------------------------------------------------------------|-------------------------------------------|--------------------------------------|---------------------------|---------------------------------------|---------------------------------|
|                   |                                         |                                                                        |                                           | Inhalation                           | Exhalation                | Breath resistance                     | Surface area                    |
| Breath resistance | USA                                     | National Institute for Occupational Safety and Health (NIOSH)          | NIOSH 42 CFR 84 <sup>1</sup>              | 343 Pa (85 L/min)                    | 245 Pa (85 L/min)         | -                                     | Whole mask                      |
|                   |                                         | American Society for Testing and Materials (ASTM)                      | ASTM F2100-19e1 <sup>2</sup>              | -                                    | -                         | 50/60/60 Pa/cm <sup>2</sup> (8 L/min) | 4.9 cm <sup>2</sup>             |
|                   | Canada                                  | Canadian Standards Association (CSA)                                   | CSA Z94.4.1:21 <sup>3</sup>               | 100/175/343 Pa (85 L/min)            | 100/175/245 Pa (85 L/min) | -                                     | Whole mask                      |
|                   | EU                                      | European Committee for Standardization (CEN)                           | EN 149 <sup>4</sup>                       | 240 Pa (90 L/min) & 70 Pa (30 L/min) | 300 Pa (160 L/min)        | -                                     | Whole mask                      |
|                   |                                         |                                                                        | EN 14683 <sup>5</sup>                     | -                                    | -                         | 40/40/60 Pa/cm <sup>2</sup> (8 L/min) | 4.9 cm <sup>2</sup>             |
|                   | China                                   | Standardization Administration of the People's Republic of China (SAC) | GB 2626-2006 <sup>6</sup>                 | 350 Pa (85 L/min)                    | 250 Pa (85 L/min)         | -                                     | Whole mask                      |
|                   |                                         |                                                                        | China Food and Drug Administration (CFDA) | YY 0469-2011 <sup>7</sup>            | -                         | -                                     | 49 Pa/cm <sup>2</sup> (8 L/min) |
| Korea             | Ministry of Food and Drug Safety (MFDS) | Notice of MFDS 2020-6 <sup>8</sup>                                     | 70 Pa (30 L/min)                          | -                                    | -                         | Whole mask                            |                                 |

| Category                                | Country | Agency | Standard                                 | Particles                            | Size                                  | Flow rate  | Filtration efficiency | Sample type    |
|-----------------------------------------|---------|--------|------------------------------------------|--------------------------------------|---------------------------------------|------------|-----------------------|----------------|
| Particulate Filtration efficiency (PFE) | USA     | NIOSH  | NIOSH 42CFR84 <sup>1</sup>               | NaCl                                 | 0.3 µm polydisperse                   | 85 L/min   | 95/99/99.97%          | Respirators    |
|                                         |         |        |                                          | Diocetyl phthalate                   | 0.3 µm polydisperse                   | 85 L/min   | 95/99/99.97%          | Respirators    |
|                                         |         | ASTM   | ASTM F2100-19e1 <sup>2</sup>             | Polystyrene latex (PSL) microspheres | 0.1 µm monodisperse                   | 28.3 L/min | 95/98/98%             | Surgical masks |
|                                         | EU      | CEN    | EN 149 <sup>4</sup>                      | NaCl                                 | 0.6 µm polydisperse                   | 95 L/min   | 80/94/99%             | Respirators    |
|                                         |         |        |                                          | Paraffin oil                         | 0.6 µm polydisperse                   | 95 L/min   | 80/94/99%             | Respirators    |
|                                         | China   | SAC    | GB 2626-2006 <sup>6</sup>                | NaCl                                 | 0.3 µm polydisperse                   | 85 L/min   | 90/95/99.97%          | Respirators    |
|                                         |         |        |                                          | Paraffin oil, dioctyl phthalate      | 0.3 µm polydisperse                   | 85 L/min   | 90/95/99.97%          | Respirators    |
|                                         | Korea   | MFDS   | Notice of MFDS 2020-6 <sup>8</sup>       | NaCl                                 | 0.6 µm polydisperse                   | 95 L/min   | 80/94/99%             | Respirators    |
| Paraffin oil                            |         |        |                                          | 0.4 µm polydisperse                  | 95 L/min                              | 80/94/99%  | Respirators           |                |
| Bacterial filtration efficiency (BFE)   | USA     | ASTM   | ASTM F2101 and ASTM F2100 <sup>2,9</sup> | <i>Staphylococcus aureus</i>         | 3.0 ± 0.3 µm mean particle size (MPS) | 28.3 L/min | 95/98/98%             | Surgical masks |
|                                         | EU      | CEN    | EN 14683 <sup>5</sup>                    | <i>Staphylococcus aureus</i>         | 3.0 ± 0.3 µm MPS                      | 28.3 L/min | 95/98/98%             | Surgical masks |
|                                         | China   | CFDA   | YY 0469-2011 <sup>7</sup>                | <i>Staphylococcus aureus</i>         | 3.0 ± 0.3 µm MPS                      | 28.3 L/min | ≥ 95%                 | Surgical masks |

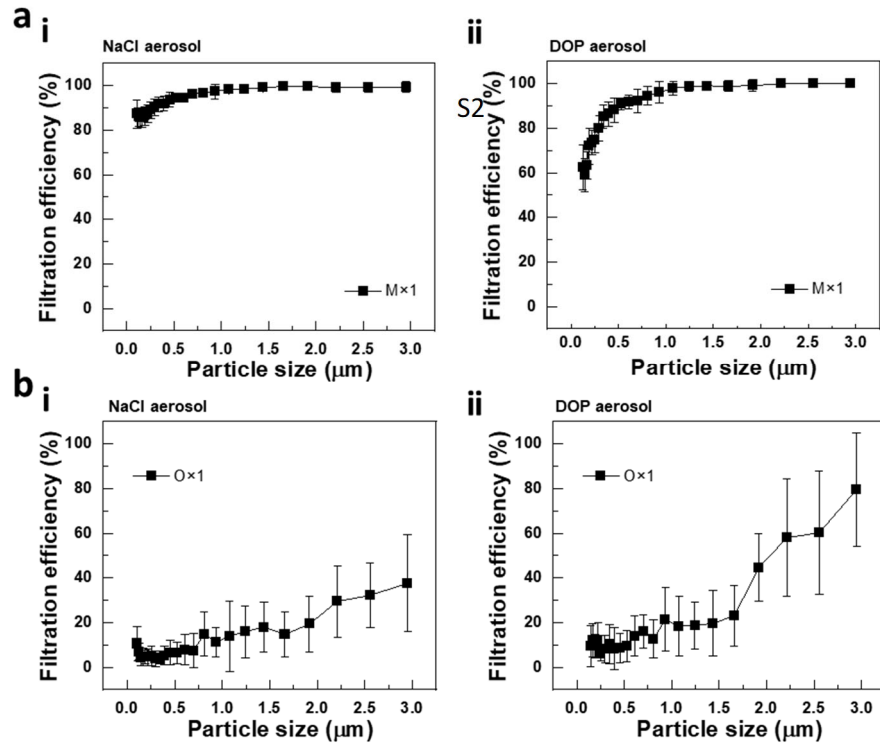

**Figure S1.** Particle size-dependent filtration efficiency of single bare fabrics. (a,b) 5% NaCl aerosol (i) and DOP aerosol (ii) used to measure the filtration efficiency of fabrics: (a) M×1 and (b) O×1. ( $n = 7-15$  for a and  $n = 9-19$  for b, mean  $\pm$  SD)).

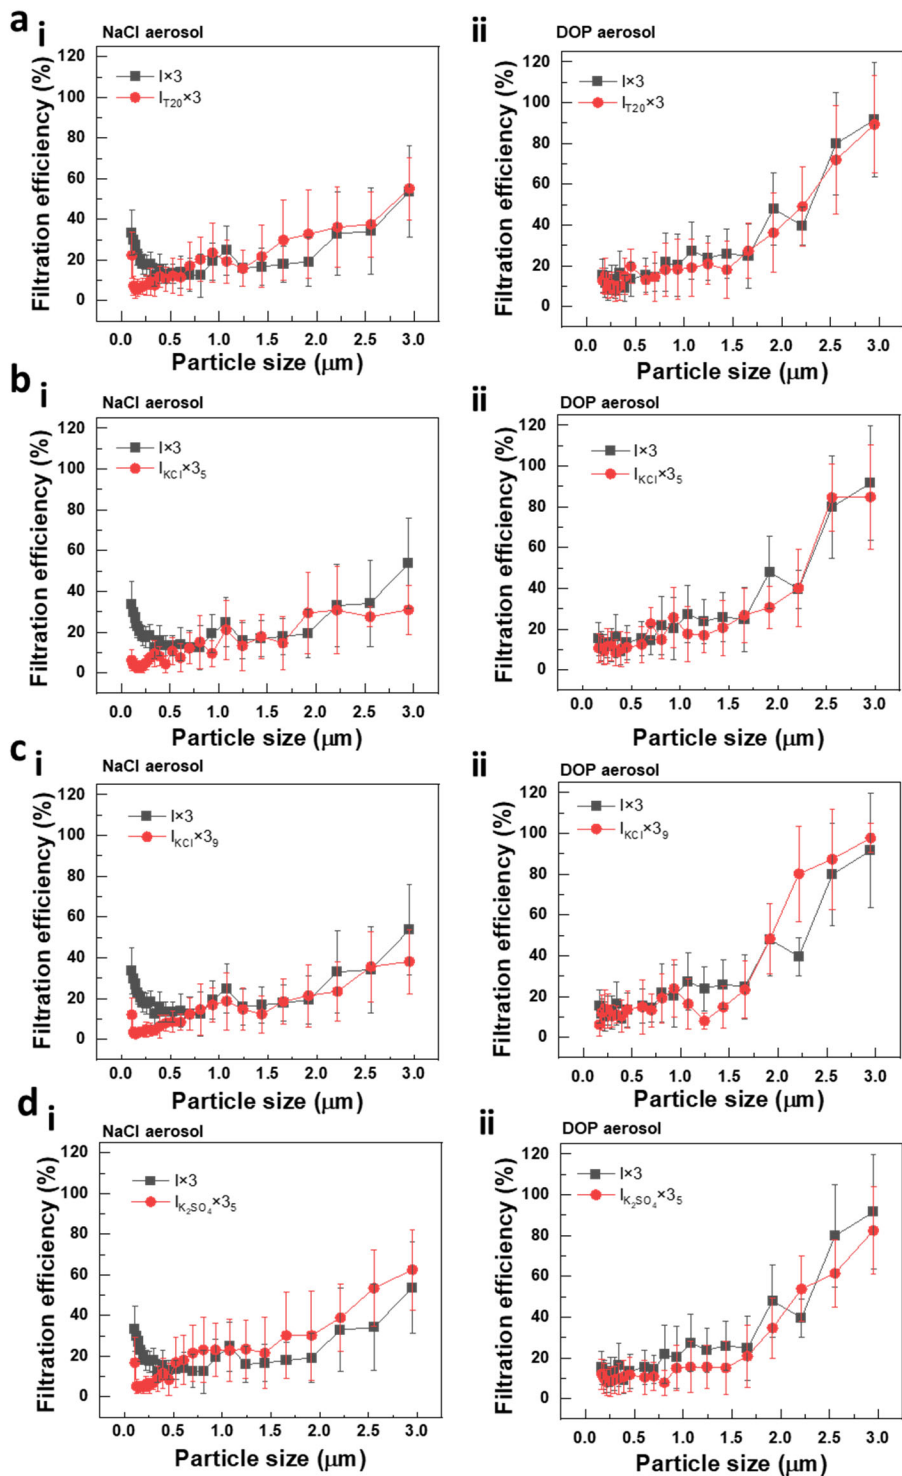

**Figure S2.** Particle size-dependent filtration efficiency of salt-coated fabric only conditions tested. (a)  $I_{T20} \times 3$  ( $n = 6-24$ , mean  $\pm$  SD), (b)  $I_{KCl} \times 3_5$  ( $n = 7-24$ , mean  $\pm$  SD), (c)  $I_{KCl} \times 3_9$  ( $n = 7-24$ , mean  $\pm$  SD), and (d)  $I_{K_2SO_4} \times 3_5$  ( $n = 7-24$ , mean  $\pm$  SD): 5% NaCl aerosol (i) and DOP aerosol (ii).

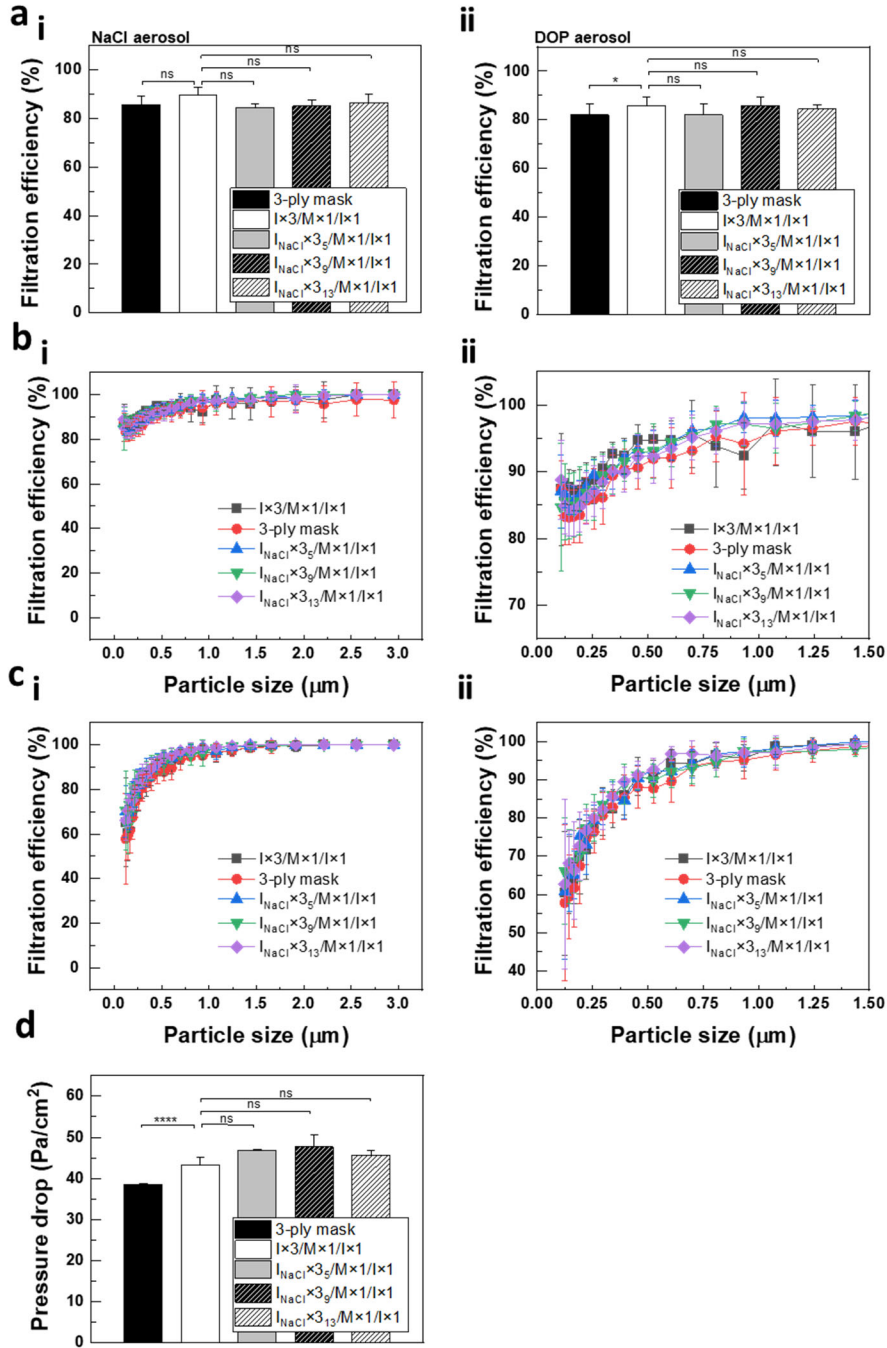

**Figure S3.** Filter performance of bare and salt-coated fabrics with different stacking sequences. Filtration efficiency and breathability were performed according to NIOSH 42CFR84 and ASTM F2100-19e1 standards, respectively. (a) Overall filtration efficiency of I×3 and I<sub>NaCl</sub>×3 as an outer of the 3-ply mask (i: 5% NaCl aerosol and ii: DOP aerosol). ( $n = 12-19$  for a(i) and  $n = 11-16$  for a(ii), mean  $\pm$  SD) (b,c) Particle size-dependent filtration efficiency of I×3 and I<sub>NaCl</sub>×3 as an outer of the 3-ply mask, tested with 5% NaCl aerosol (b) and DOP aerosol (c) (i: filtration efficiency of stacked fabrics and ii: zoomed-in filtration efficiency of the stacked fabrics). ( $n = 12-19$  for b and  $n = 7-16$  for c, mean  $\pm$  SD). (d) Breathability of I×3 and I<sub>NaCl</sub>×3 used as an outer. ( $n = 9-12$ , mean  $\pm$  SD).

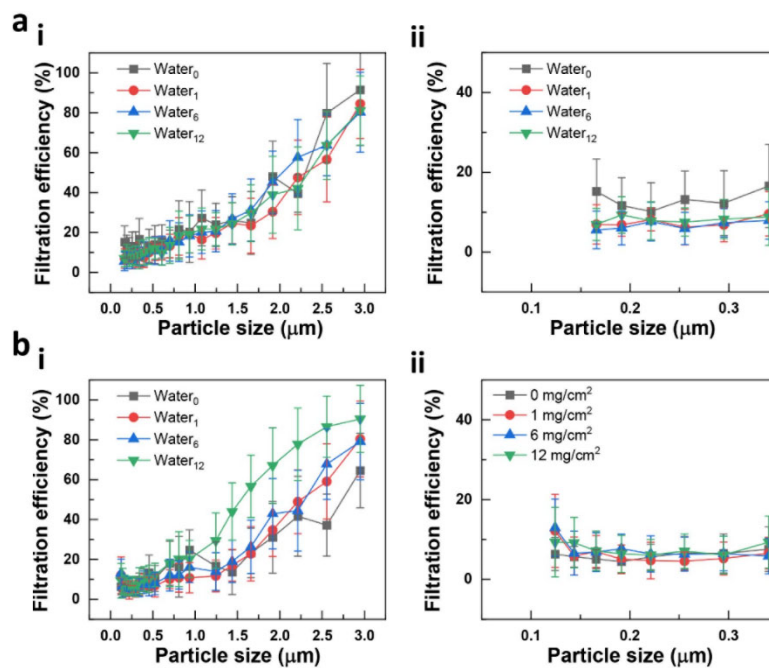

**Figure S4.** Particle size-dependent filtration efficiency of  $I \times 3$  (a) and  $I_{NaCl} \times 3_9$  (b) tested with DOP aerosols (i: filtration efficiency of fabrics and ii: zoomed-in filtration efficiency of the fabrics).

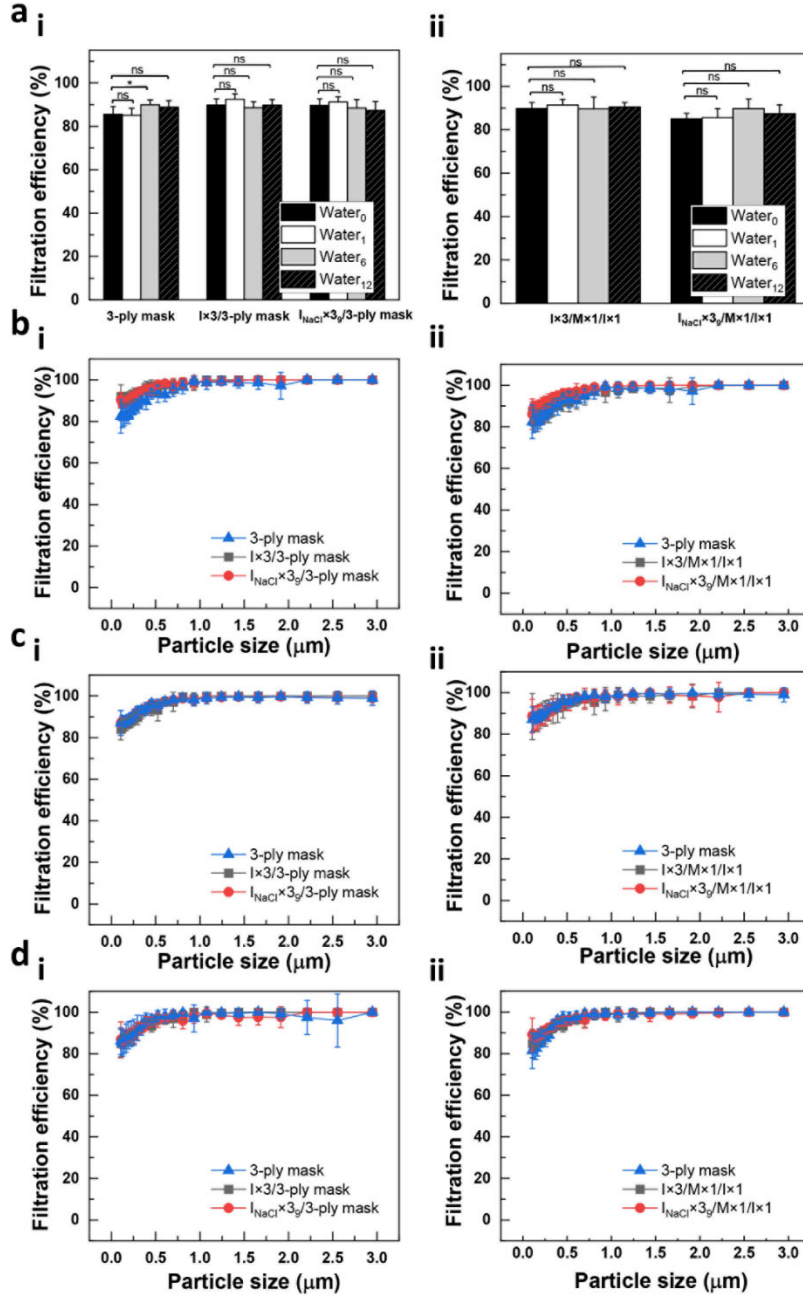

**Figure S5.** Filtration efficiency of wet I×3 and I<sub>NaCl</sub>×3 as a cover and an outer layer of the 3-ply mask, tested with 5% NaCl aerosol according to NIOSH 42CFR84. (a–d) I×3 and I<sub>NaCl</sub>×3<sub>g</sub> fabrics used as a cover (i) and an outer layer (ii): (a) overall filtration efficiency ( $n = 9–20$ , mean  $\pm$  SD), (b) 1 mg/cm<sup>2</sup> of water ( $n = 10–13$ , mean  $\pm$  SD), (c) 6 mg/cm<sup>2</sup> of water ( $n = 9–13$ , mean  $\pm$  SD), and (d) 12 mg/cm<sup>2</sup> of water ( $n = 10–11$ , mean  $\pm$  SD). For all panels: ns,  $P > 0.05$ ; \*,  $P < 0.05$ , by GLM.

## References

- (1) National Institute for Occupational Safety and Health. NIOSH 42CFR84: Respiratory Protective Devices. U.S. Department of Health and Human Services: Washington, DC, 1995.
- (2) ASTM International. ASTM F2100-19e1: Standard Specification for Performance of Materials Used in Medical Face Masks. ASTM International: West Conshohocken, PA, 2019.
- (3) Canadian Standards Association. CSA Z94.4.1:21: performance of filtering respirators. Canadian Standards Association: Mississauga, ON, 2021.
- (4) European Committee for Standardisation. EN 149: Respiratory protective devices - Filtering half masks to protect against particles - Requirements, testing, marking. CEN: Brussels, Belgium, 2009.
- (5) European Committee for Standardization. EN 14683: Medical face masks – Requirements and test methods. CEN: Brussels, Belgium, 2019.
- (6) Standardization Administration of the People's Republic of China. GB 2626-2006: Respiratory protective equipment – Non-powered air-purifying particle respirator. SAC: Beijing, China, 2006.
- (7) Standardization Administration of the People's Republic of China. YY 0469: surgical mask. SAC: Beijing, China, 2011.
- (8) Ministry of Food and Drug Safety. MFDS 2020-6: 보건용 마스크의 기준 규격에 대한 가이드라인. Ministry of Food and Drug Safety: Cheong-Ju, Korea, 2020.
- (9) ASTM International. ASTM F2101: standard test method for evaluating the bacterial filtration efficiency of medical face mask materials, using a biological aerosol of staphylococcus aureus. ASTM International: West Conshohocken, PA, 2019.
